# Supplementary material
Source: ML conference proceedings conference paper supplement (https://openaccess.thecvf.com/content/ICCV2023/html/Wang_Event-Guided_Procedure_Planning_ICCV_2023_paper.html)
Supplement: Supplementary file 1 [file Wang_Event-Guided_Procedure_Planning_ICCV_2023_supplemental.pdf]

# Appendix for Event-Guided Procedure Planning from Instructional Videos with Text Supervision

An-Lan Wang\*, Kun-Yu Lin\*, Jia-Run Du, Jingke Meng<sup>†</sup>, Wei-Shi Zheng<sup>†</sup>

School of Computer Science and Engineering, Sun Yat-sen University, China

Key Laboratory of Machine Intelligence and Advanced Computing, Ministry of Education, China

{wanganlan, linky5, dujr6}@mail2.sysu.edu.cn, mengjke@gmail.com, wszheng@ieee.org

## A. Appendix Overview

Due to the lack of space in the main manuscript, we provide more specific details of our Event-guided Prompting-based Procedure Planning (E3P) in the *Appendix*, organized as follows: Section B provides a more detailed description of our E3P implementation. Section C includes several additional experiments.

## B. Implementation Details

Following previous work [A1], we use pre-extracted visual and text features. The dimension of the pre-extracted visual and text features is 512, we use two multi-layer perceptrons (MLP) with shape [512  $\rightarrow$  256  $\rightarrow$  128] interspersed with ReLU to embed the original visual and text feature, respectively. For the Event-aware Prompt Generator, the event-information extractor is implemented using a MLP with shape [256  $\rightarrow$  64  $\rightarrow$  128], and the event-information aggregator is a Transformer encoder of one self-attention layer with 128-dimensional hidden states. For the Action Relation Mining module, we use two masked self-attention layers followed by a feed-forward network (FFN).

## C. Additional Experiments

In addition to the various ablations reported in the main manuscript, we provide some additional experiments to verify the effectiveness of our proposed Event-guided Prompting-based Procedure Planning (E3P).

### C.1. Effect of the Event-information Aggregator

For the event-information aggregator, we provide two implementations, *Concat*, *Transf* (*i.e.*, used in the main manuscript):

\* indicates equal contribution. <sup>†</sup> indicates the corresponding author.

Table A1: Effect of Event-information Aggregator for prediction horizon  $T \in \{3, 4\}$  on CrossTask dataset. SR and mAcc indicate Success Rate and mean Accuracy, respectively. P3IV is the latest state-of-the-art method.

| Model     | $T = 3$       |                 | $T = 4$       |                 |
|-----------|---------------|-----------------|---------------|-----------------|
|           | SR $\uparrow$ | mAcc $\uparrow$ | SR $\uparrow$ | mAcc $\uparrow$ |
| Concat    | 25.77         | 51.32           | 15.41         | 47.44           |
| Transf    | 26.40         | 53.02           | 16.49         | 48.00           |
| P3IV [A1] | 23.34         | 49.96           | 13.40         | 44.16           |

- *Concat* first concatenates the prompt representation with the event information and then uses a MLP to project to its original dimension.
- *Transf* means using a Transformer encoder of one self-attention layer to process the  $T + 1$  Tokens, *i.e.*,  $T$  prompt representations and one event information token.

In Table A1, we conduct experiments using different event-information aggregator implementations. “*Transf*” outperforms “*Concat*” in all prediction horizon  $T \in \{3, 4\}$  (*i.e.*, 0.63% when  $T = 3$  and 1.08% when  $T = 4$  in terms of Success Rate). In addition, “*concat*” still achieves state-of-the-art performance, which demonstrates the effectiveness of the proposed event-guided paradigm.

### C.2. Analysis of the number of layers used in the Action Relation Mining

In Table A2, we ablate the number of masked self-attention layers used in the Action Relation Mining module (drop rate is 0.2). The results show that using two masked self-attention layers (*i.e.* used in the main manuscript) attains the best performance, *i.e.*, 26.26% when  $T = 3$  and 16.49% when  $T = 4$  in terms of Success Rate (SR).

Table A2: Quantitative analysis of the number of masked self-attention layers used in the Action Relation Mining module for prediction  $T \in \{3, 4\}$  on CrossTask dataset. SR and mAcc indicate Success Rate and mean Accuracy, respectively.

| Number of Layers | $T = 3$       |                 | $T = 4$       |                 |
|------------------|---------------|-----------------|---------------|-----------------|
|                  | SR $\uparrow$ | mAcc $\uparrow$ | SR $\uparrow$ | mAcc $\uparrow$ |
| 1                | 25.97         | 52.69           | 16.10         | 47.50           |
| 2                | 26.26         | 52.91           | 16.49         | 48.00           |
| 3                | 26.14         | 52.77           | 16.15         | 47.69           |
| 4                | 25.56         | 52.42           | 15.69         | 47.43           |

Table A3: Comparison to previous state-of-the-art methods using Visual State Supervision for prediction  $T = 3$  on CrossTask dataset, in terms of Success Rate (SR), mean Accuracy (mAcc), and mean Intersection over Union (mIoU).

| Methods                   | SR $\uparrow$ | mAcc $\uparrow$ | mIoU $\uparrow$ |
|---------------------------|---------------|-----------------|-----------------|
| baseline                  | 22.86         | 47.87           | 70.34           |
| + event-guided paradigm   | 25.70         | 53.19           | 72.76           |
| P3IV [A1] with visual sup | 24.41         | 45.17           | 73.83           |

### C.3. Effect of the event-guide paradigm

To verify the effect of the event-guided paradigm in Procedure Planning from instructional videos with Visual Supervision (PPVS), we conduct an experiment that adopts the event-guided paradigm to a variant of P3IV [A1]. In this variant (*i.e.*, baseline), we remove the adversarial strategy and use intermediate visual states as supervision. Then, we insert our proposed Event-guided Prompt Generator (EPG) into this variant (*i.e.*, + event-guided paradigm), but instead of hand-craft prompts, the input to this EPG is learnable queries. The results are shown in A3, by introducing the event-guided paradigm, we attain a significant improvement (*e.g.*, 1.84% in terms of Success Rate), outperforming P3IV [A1] with visual state supervision (*i.e.*, P3IV with visual sup). These consistent results demonstrate the effectiveness of our proposed event-guided paradigm for PPVS.

## References

[A1] He Zhao, Isma Hadji, Nikita Dvornik, Konstantinos G Derpanis, Richard P Wildes, and Allan D Jepson. P3iv: Probabilistic procedure planning from instructional videos with weak supervision. In *CVPR*, 2022. 1, 2
